# Supplementary material for: Biocompatible Catanionic Vesicles from Arginine-Based Surfactants: A New Strategy to Tune the Antimicrobial Activity and Cytotoxicity of Vesicular Systems
Source: PubMed Central journal article supplement (PMC7557587; doi:10.3390/pharmaceutics12090857), 2020-09-09
Supplement: pharmaceutics-12-00857-s001.pdf [file pharmaceutics-12-00857-s001.pdf]

# Supplementary Materials: Biocompatible Catanionic Vesicles from Arginine-Based Surfactants: A New Strategy to Tune the Antimicrobial Activity and Cytotoxicity of Vesicular Systems

Aurora Pinazo<sup>1</sup>, Ramon Pons<sup>1</sup>, Ana Marques<sup>2</sup>, Maribel Farfan. <sup>2</sup>, Anderson Ramos da Silva<sup>1</sup> and Lourdes Perez<sup>1\*</sup>

**Table S1.** Mean diameter, polydispersity index, z-potential values and visual appearance of the catanionic mixtures at day 20. Photographs corresponding to the C3L and C3S systems: left 2.8, center 5.5, right 8.2.

|      | Formulation | Size (Dh nm) | Pdl         | Z potential (mV) | Visual aspect |
|------|-------------|--------------|-------------|------------------|---------------|
| 1 mM | 2.8 C3S     | 183          | 0.100       | -25              |               |
|      | 5.5 C3S     | 515          | 0.230       | +27              |               |
|      | 8.2 C3S     | 396          | 0.169       | +39              |               |
|      | 2.8C3L      |              | precipitate |                  |               |
|      | 5.5C3L      |              | precipitate |                  |               |
|      | 8.2C3L      | 417          | 0.625       | +46              |               |
| 5 mM | 2.8 C3S     | 227          | 0.226       | -58              |               |
|      | 5.5 C3S     | 487          | 0.261       | +65              |               |
|      | 8.2 C3S     | 229          | 0.210       | +66              |               |
|      | 2.8C3L      |              | Gel         |                  |               |
|      | 5.5C3L      |              | Precipitate |                  |               |
|      | 8.2C3L      | 388          | 0.623       | viscous          |               |

**Table S2.** Mean diameter, polydispersity index, z-potential values and visual appearance of the cholesterol containing catanionic mixtures (1 mM) at day 7 and 30. Photographs corresponding to the C3L and C3S systems: left 8.2, center 5.5 and right 2.8.

|         | DAY 7       |      |       |               | DAY 30 |       |               |
|---------|-------------|------|-------|---------------|--------|-------|---------------|
|         | Formulation | Size | Pdl   | Visual aspect | Size   | Pdl   | Visual aspect |
| 10% col | 2.8C3L      | 683  | 0.373 |               | 2745   | 1     |               |
|         | 5.5C3L      | 180  | 0.289 |               | 1458   | 0.485 |               |
|         | 8.2C3L      | 112  | 0.032 |               | 126    | 0.071 |               |
|         | 2.8 C3S     | 245  | 0.038 |               | 240    | 0.230 |               |
|         | 5.5 C3S     | 683  | 0.512 |               | 563    | 0.613 |               |
|         | 8.2 C3S     | 173  | 0.125 |               | 182    | 0.119 |               |
| 20% col | 2.8C3L      | 926  | 0.532 |               | 773    | 0.424 |               |
|         | 5.5C3L      | 197  | 0.180 |               | 197    | 0.164 |               |
|         | 8.2C3L      | 164  | 0.342 |               | 161    | 0.223 |               |
|         | 2.8 C3S     | 255  | 0.372 |               | 235    | 0.230 |               |
|         | 5.5 C3S     | 412  | 0.344 |               | 244    | 0.351 |               |
|         | 8.2 C3S     | 196  | 0.191 |               | 171    | 0.399 |               |

**Table S3.** MIC values ( $\mu\text{M}$ ) of the pure C3(CA)<sub>2</sub>, 8-HS and sodium laurate.

|                       | C <sub>3</sub> (CA) <sub>2</sub> | 8-SHS | SL |
|-----------------------|----------------------------------|-------|----|
| <i>S. aureus</i> MRSA | 9                                | >     | >  |
| <i>B. subtilis</i>    | 9                                | 72    | >  |
| <i>K. rhizophila</i>  | 9                                | >     | >  |
| <i>S. epidermidis</i> | 9                                | 72    | >  |
| <i>K. pneumoniae</i>  | >                                | >     | >  |
| <i>P. aeruginosa</i>  | 36                               | >     | >  |
| <i>E. coli</i>        | 36                               | >     | >  |
| <i>C. albicans</i>    | 18                               | >     | >  |

**Table S4.** MIC values ( $\mu\text{M}$ ) of cationic mixtures.

|                       | 2.8.C3.S | 5.5.C3.S | 8.2.C3.S | 2.8.C3.L | 5.5.C3.L | 8.2.C3.L |
|-----------------------|----------|----------|----------|----------|----------|----------|
| <i>S. aureus</i> MRSA | >        | 72       | 18       | 144      | 18       | 9        |
| <i>B. subtilis</i>    | >        | 72       | 36       | 72       | 18       | 9        |
| <i>K. rhizophila</i>  | >        | 72       | 18       | 144      | 18       | 4        |
| <i>S. epidermidis</i> | >        | 36       | 18       | 144      | 18       | 9        |
| <i>K. pneumoniae</i>  | >        | >        | >        | 144      | 144      | 144      |
| <i>P. aeruginosa</i>  | >        | 144      | 72       | -        | 72       | 72       |
| <i>E. coli</i>        | >        | 72       | 36       | 72       | 72       | 18       |
| <i>C. albicans</i>    | >        | 72       | 18       | 72       | 36       | 72       |

**Table S5.** MIC values ( $\mu\text{M}$ ) of cholesterol containing (10%) cationic mixture.

|                       | 2.8.C3.S<br>(10%) | 5.5.C3.S<br>(10%) | 8.2.C3.S<br>(10%) | 2.8.C3.L<br>(10%) | 5.5.C3.L<br>(10%) | 8.2.C3.L<br>(10%) |
|-----------------------|-------------------|-------------------|-------------------|-------------------|-------------------|-------------------|
| <i>S. aureus</i> MRSA | 288               | 36                | 9                 | 72                | 72                | 36                |
| <i>B. subtilis</i>    | 288               | 36                | 72                | 288               | 36                | 36                |
| <i>K. rhizophila</i>  | 288               | 36                | 9                 | 72                | 72                | 36                |
| <i>S. epidermidis</i> | 288               | 36                | 9                 | 288               | 36                | 9                 |
| <i>K. pneumoniae</i>  | >                 | >                 | 72                | >                 | >                 | >                 |
| <i>P. aeruginosa</i>  | >                 | 36                | 36                | >                 | 72                | 36                |
| <i>E. coli</i>        | >                 | 36                | 36                | 144               | 72                | 36                |
| <i>C. albicans</i>    | >                 | 18                | 9                 | 72                | 72                | 36                |

**Table S6.** MIC values ( $\mu\text{M}$ ) of cholesterol containing (20%) cationic mixtures.

|                       | 2.8.C3.S<br>(20%) | 5.5.C3.S<br>(20%) | 8.2.C3.S<br>(20%) | 2.8.C3.L<br>(20%) | 5.5.C3.L<br>(20%) | 8.2.C3.L<br>(20%) |
|-----------------------|-------------------|-------------------|-------------------|-------------------|-------------------|-------------------|
| <i>S. aureus</i> MRSA | >                 | 36                | 18                | 144               | 72                | 36                |
| <i>B. subtilis</i>    | >                 | 72                | 72                | 288               | 288               | 36                |
| <i>K. rhizophila</i>  | >                 | 36                | 18                | >                 | 72                | 36                |
| <i>S. epidermidis</i> | 288               | 36                | 18                | 288               | 288               | 9                 |
| <i>K. pneumoniae</i>  | >                 | >                 | >                 | >                 | >                 | >                 |
| <i>P. aeruginosa</i>  | >                 | 72                | 36                | >                 | >                 | 72                |
| <i>E. coli</i>        | >                 | 36                | 36                | >                 | 144               | 72                |
| <i>C. albicans</i>    | >                 | 18                | 18                | >                 | 72                | 72                |

**Table S7.** MBC values ( $\mu\text{M}$ ) of cholesterol containing (10%) cationic mixtures.

|                       | 2.8.C3.S<br>(10%) | 5.5.C3.S<br>(10%) | 8.2.C3.S<br>(10%) | 2.8.C3.L<br>(10%) | 5.5.C3.L<br>(10%) | 8.2.C3.L<br>(10%) |
|-----------------------|-------------------|-------------------|-------------------|-------------------|-------------------|-------------------|
| <i>S. aureus</i> MRSA | >                 | 36                | 36                | 144               | 72                | 36                |
| <i>B. subtilis</i>    | 288               | 72                | 288               | 288               | 144               | 72                |
| <i>K. rhizophila</i>  | 288               | 36                | 9                 | 72                | 72                | 144               |
| <i>S. epidermidis</i> | >                 | 36                | 9                 | 288               | 36                | 18                |
| <i>K. pneumoniae</i>  | >                 | >                 | 288               | >                 | >                 | >                 |
| <i>P. aeruginosa</i>  | >                 | 36                | 36                | >                 | 144               | 36                |
| <i>E. coli</i>        | >                 | 36                | 9                 | 144               | 144               | 72                |
| <i>C. albicans</i>    | >                 | 18                | 9                 | 72                | 72                | 72                |

**Table S8.** MBC values ( $\mu\text{M}$ ) of cholesterol containing (20%) catanionic mixtures.

|                       | 2.8.C3.S<br>(20%) | 5.5.C3.S<br>(20%) | 8.2.C3.S<br>(20%) | 2.8.C3.L<br>(20%) | 5.5.C3.L<br>(20%) | 8.2.C3.L<br>(20%) |
|-----------------------|-------------------|-------------------|-------------------|-------------------|-------------------|-------------------|
| <i>S. aureus</i> MRSA | >                 | 36                | 72                | 144               | 288               | 144               |
| <i>B. subtilis</i>    | >                 | 72                | 144               | 288               | >                 | 36                |
| <i>K. rhizophila</i>  | >                 | 36                | 18                | >                 | 72                | 288               |
| <i>S. epidermidis</i> | >                 | 36                | 36                | 288               | 288               | 36                |
| <i>K. pneumoniae</i>  | >                 | >                 | >                 | >                 | >                 | >                 |
| <i>P. aeruginosa</i>  | >                 | 288               | 36                | >                 | >                 | 72                |
| <i>E. coli</i>        | >                 | 36                | 18                | >                 | 144               | 72                |
| <i>C. albicans</i>    | >                 | 18                | 18                | >                 | 72                | 144               |

**Table S9.** Therapeutic index ( $\text{HC}_{50}/\text{MIC}$ ) for the pure gemini surfactant and its catanionic mixtures.

|                       | $\text{C}_3(\text{CA})_2$ | 2.8.C3.S          | 5.5.C3.S          | 8.2.C3.S          | 2.8.C3.L          | 5.5.C3.L          | 8.2.C3.L          |
|-----------------------|---------------------------|-------------------|-------------------|-------------------|-------------------|-------------------|-------------------|
| <i>S. aureus</i> MRSA | 6.7                       | <1                | 2.2               | 4.4               | >1                | >11               | 12                |
| <i>B. subtilis</i>    | 6.7                       | <1                | 2.2               | 2.2               | >2.8              | >11               | 12                |
| <i>K. rhizophila</i>  | 6.7                       | <1                | 2.2               | 4.4               | >1                | >11               | 24                |
| <i>S. epidermidis</i> | 6.7                       | <1                | 4.4               | 4.4               | >1                | >11               | 12                |
| <i>K. pneumoniae</i>  | -                         | <1                | <1                | <1                | >1                | >1.3              | 0.8               |
| <i>P. aeruginosa</i>  | 1.7                       | <1                | 1.2               | 1.1               | -                 | >3                | 1.5               |
| <i>E. coli</i>        | 1.7                       | <1                | 2.2               | 2.2               | <2.8              | >3                | 6                 |
| <i>C. albicans</i>    | 3.4                       | <1                | 2.2               | 4.4               | <2.8              | >3                | 1.5               |
|                       |                           | 2.8.C3.S<br>(10%) | 5.5.C3.S<br>(10%) | 8.2.C3.S<br>(10%) | 2.8.C3.L<br>(10%) | 5.5.C3.L<br>(10%) | 8.2.C3.L<br>(10%) |
| <i>S. aureus</i> MRSA |                           | 0.5               | >4                | 9.4               | >2                | >2.2              | 2.8               |
| <i>B. subtilis</i>    |                           | 0.5               | >4                | 1.2               | -                 | >4.4              | 2.8               |
| <i>K. rhizophila</i>  |                           | 0.5               | >4                | 9.4               | >2                | >2.2              | 2.8               |
| <i>S. epidermidis</i> |                           | 0.5               | >4                | 9.4               | -                 | >4.4              | 5.6               |
| <i>K. pneumoniae</i>  |                           | <0.5              | -                 | 1.2               | -                 | -                 | <1                |
| <i>P. aeruginosa</i>  |                           | <0.5              | >4                | 2.5               | -                 | >2.2              | 2.8               |
| <i>E. coli</i>        |                           | <0.5              | >4                | 2.5               | >1                | >2.2              | 2.8               |
| <i>C. albicans</i>    |                           | <0.5              | >8                | 9.4               | >2                | >2.2              | 2.8               |
|                       |                           | 2.8.C3.S<br>(20%) | 5.5.C3.S<br>(20%) | 8.2.C3.S<br>(20%) | 2.8.C3.L<br>(20%) | 5.5.C3.L<br>(20%) | 8.2.C3.L<br>(20%) |
| <i>S. aureus</i> MRSA |                           | -                 | >4.4              | >8.8              | 1                 | >2.2              | >4.4              |
| <i>B. subtilis</i>    |                           | -                 | >2.2              | >2.2              | -                 | -                 | >4.4              |
| <i>K. rhizophila</i>  |                           | -                 | >4.4              | >8.8              | -                 | >2.2              | >4.4              |
| <i>S. epidermidis</i> |                           | -                 | >4.4              | >8.8              | -                 | -                 | >16               |
| <i>K. pneumoniae</i>  |                           | -                 | -                 | -                 | -                 | -                 | -                 |
| <i>P. aeruginosa</i>  |                           | -                 | >2.2              | >4.4              | -                 | -                 | >2.2              |
| <i>E. coli</i>        |                           | -                 | >4.4              | >4.4              | -                 | >1                | >2.2              |
| <i>C. albicans</i>    |                           | -                 | >8.8              | >8.8              | -                 | >2.2              | >2.2              |

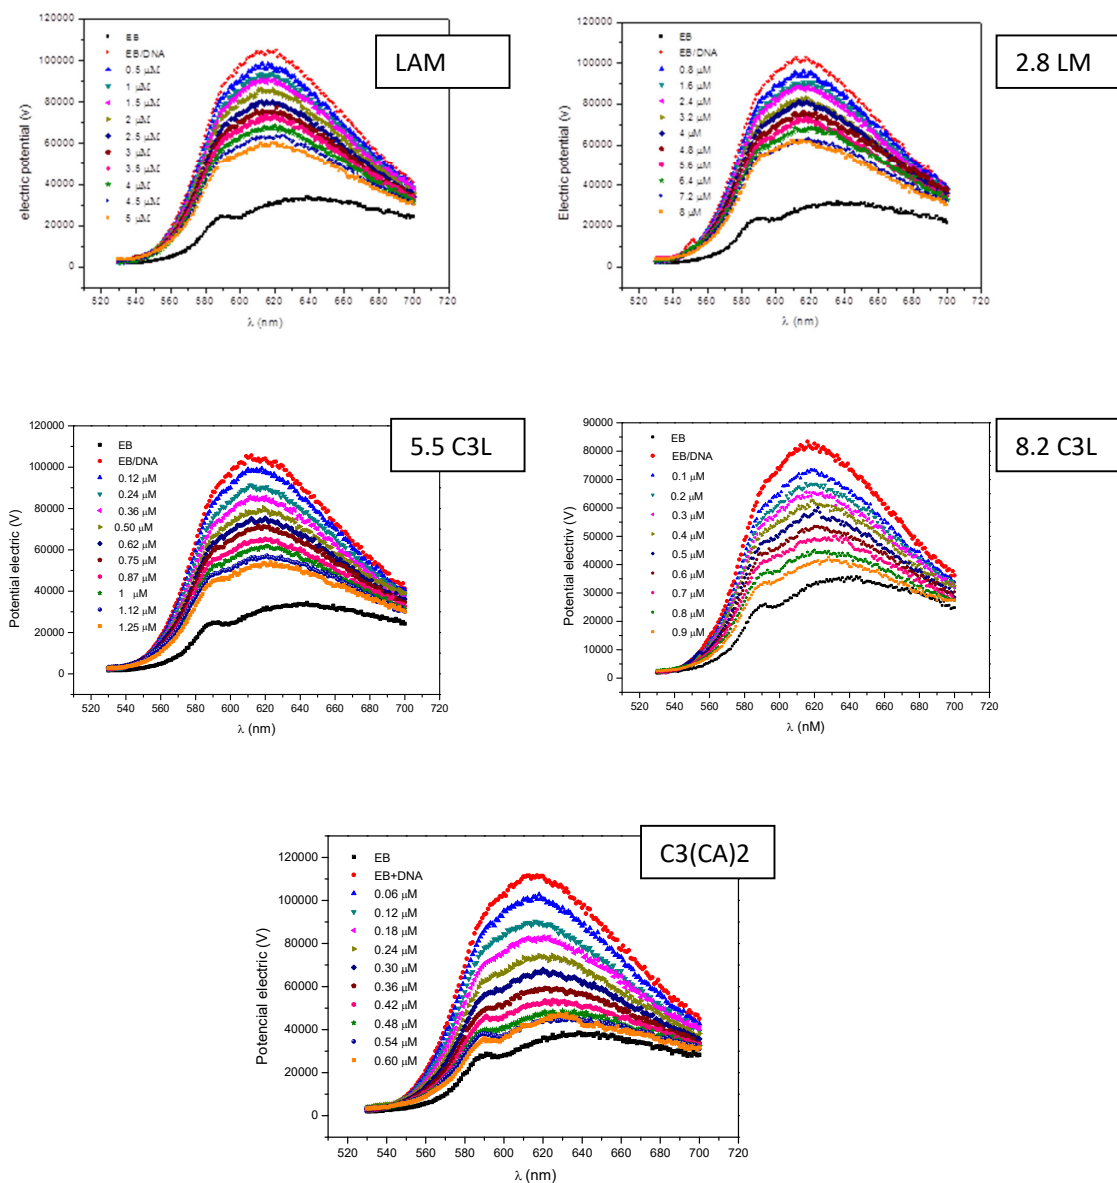

Figure S1. Ethidium bromide exclusion experiments for LAM, C3(CA)2 and their catanionic mixtures.
